# Supplementary material
Source: PubMed Central journal article supplement (PMC6123650)

Figure 1a

Keap1

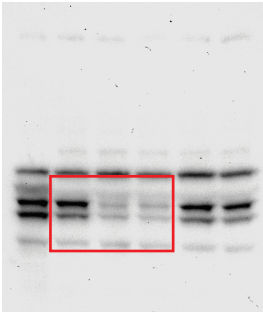

Tubulin

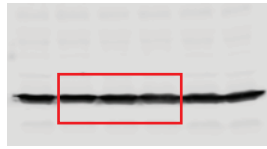

Supplement: EMBR-19-e45553-s002.pdf [file EMBR-19-e45553-s002.pdf]

Figure 2a

H4ac

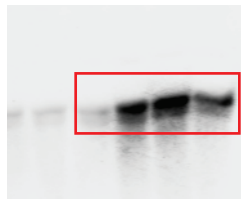

Actin

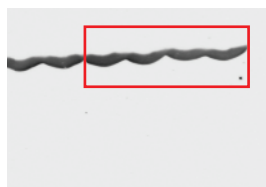

Figure 2b

HDAC2

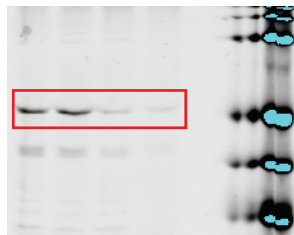

HDAC1

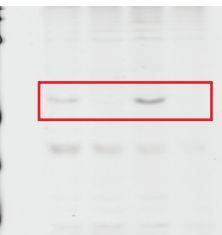

Actin

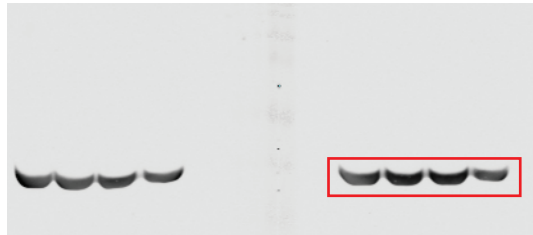

Supplement: EMBR-19-e45553-s003.pdf [file EMBR-19-e45553-s003.pdf]

Figure 3a

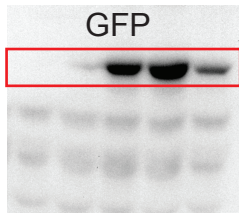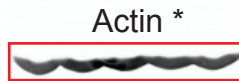

\* Loading control  
run on different gel

Figure 3c

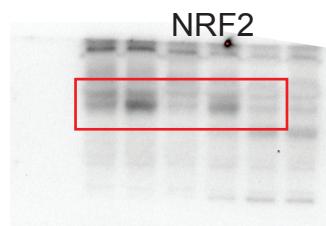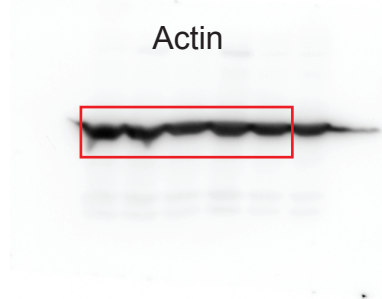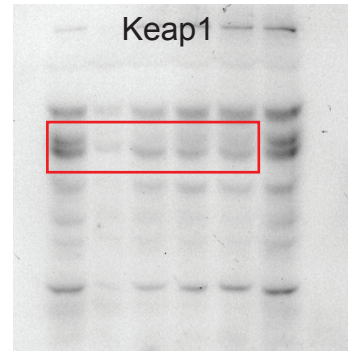

Supplement: EMBR-19-e45553-s004.pdf [file EMBR-19-e45553-s004.pdf]

Figure EV1b

Keap1

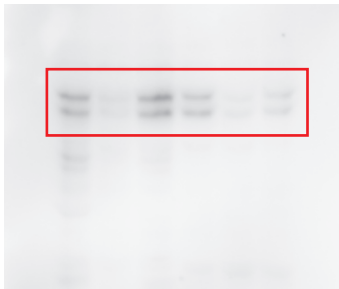

Actin

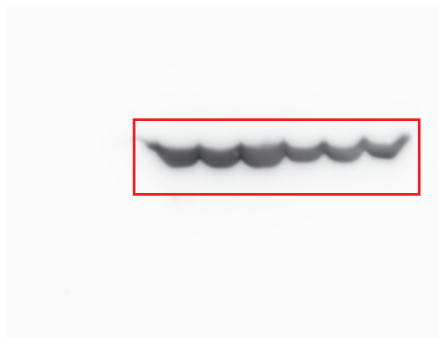

Supplement: EMBR-19-e45553-s005.pdf [file EMBR-19-e45553-s005.pdf]
